# Supplementary material for: Innate immune activity as a predictor of persistent insulin secretion and association with responsiveness to CTLA4-Ig treatment in recent-onset type 1 diabetes
Source: PubMed Central journal article supplement (PMC6182660; doi:10.1007/s00125-018-4708-x), 2018-08-30
Supplement: 125_2018_4708_MOESM1_ESM.pdf [file 125_2018_4708_MOESM1_ESM.pdf]

ESM TABLE 1 Subject Information TN09

| Study | Treatment Arm | Subject ID         | Gender | Age at diagnosis | Age at baseline visit | Duration of DM @ I.I.359 | Length of Partial remission (CPEP > 0.2 nmo/L) | HbA1c at initial visit (mmol/mol) | HbA1c at initial visit (%) | Weight (kg) | Height (cm) | BMI SDS | BMI Percentile | Number of Detected Autoantibodies | HLA Risk (High: DR3 and/or DR4 positive; Low nonDR3 and nonDR4) | WGCGNA Group Assignment | Selected Treated Responder     |                               |                             |                              |                              |                              |                              |      |
|-------|---------------|--------------------|--------|------------------|-----------------------|--------------------------|------------------------------------------------|-----------------------------------|----------------------------|-------------|-------------|---------|----------------|-----------------------------------|-----------------------------------------------------------------|-------------------------|--------------------------------|-------------------------------|-----------------------------|------------------------------|------------------------------|------------------------------|------------------------------|------|
|       |               |                    |        |                  |                       |                          |                                                |                                   |                            |             |             |         |                |                                   |                                                                 |                         | Sample and Placebo Fast Sample | Mean 2hr CPEP by min Baseline | Mean 2hr CPEP by min Day 84 | Mean 2hr CPEP by min Day 196 | Mean 2hr CPEP by min Day 364 | Mean 2hr CPEP by min Day 560 | Mean 2hr CPEP by min Day 728 |      |
| TN09  | ABATACEPT     | CTLA4_CT_P19002922 | Male   | 17.91            | 18.21                 | 0.30                     | -0.33                                          | NA                                | 40.3                       | 6.5         | 78.6        | 170     | 1.32           | 91                                | 1                                                               | high                    | G1                             | 0                             | 1.07                        | 1.00                         | 0.93                         | 1.11                         | 1.00                         | 1.04 |
| TN09  | ABATACEPT     | CTLA4_CT_P19003388 | Female | 21.08            | 21.35                 | 0.27                     | -0.02                                          | NA                                | 32.9                       | 5.3         | 81.2        | 182.5   | 0.31           | 62                                | 2                                                               | high                    | G2                             | 0                             | 0.86                        | 0.54                         | 0.42                         | 0.36                         | 0.30                         | 0.12 |
| TN09  | ABATACEPT     | CTLA4_CT_P19009315 | Male   | 11.59            | 11.85                 | 0.27                     | -0.09                                          | NA                                | 39.1                       | 6.3         | 38          | 147     | -0.05          | 48                                | 3                                                               | high                    | G2                             | 0                             | 0.68                        | 0.46                         | 0.36                         | 0.24                         | 0.19                         | 0.15 |
| TN09  | ABATACEPT     | CTLA4_CT_P19010058 | Male   | 14.21            | 14.48                 | 0.27                     | 0.16                                           | NA                                | 32.9                       | 5.3         | 68.2        | 180.8   | 0.48           | 68                                | 4                                                               | high                    | G4                             | 0                             | 0.60                        | 0.47                         | 0.43                         | 0.33                         | 0.24                         | 0.19 |
| TN09  | ABATACEPT     | CTLA4_CT_P19011880 | Female | 9.28             | 9.57                  | 0.29                     | -0.13                                          | NA                                | 45.3                       | 7.3         | 36.5        | 134.7   | 1.17           | 88                                | 2                                                               | high                    | G2                             | 0                             | 0.22                        | 0.19                         | 0.12                         | 0.10                         | 0.11                         | 0.03 |
| TN09  | ABATACEPT     | CTLA4_CT_P19015071 | Male   | 16.52            | 16.73                 | 0.21                     | -0.05                                          | NA                                | 39.1                       | 6.3         | 67.2        | 174.6   | 0.38           | 65                                | 2                                                               | high                    | G2                             | 0                             | 0.55                        | 0.27                         | 0.16                         | 0.06                         | 0.07                         | 0.05 |
| TN09  | ABATACEPT     | CTLA4_CT_P19016746 | Female | 8.11             | 8.29                  | 0.18                     | 0.14                                           | NA                                | 35.3                       | 5.7         | 35.6        | 139     | 1.01           | 84                                | 3                                                               | high                    | G4                             | 0                             | 1.03                        | 0.90                         | 0.90                         | 0.59                         | 0.72                         | 0.72 |
| TN09  | ABATACEPT     | CTLA4_CT_P19018458 | Male   | 8.38             | 8.66                  | 0.28                     | 0.05                                           | NA                                | 39.1                       | 6.3         | 27.9        | 138.5   | -1.03          | 15                                | 3                                                               | low                     | G4                             | 0                             | 0.44                        | 0.53                         | 0.41                         | 0.22                         | 0.25                         | 0.21 |
| TN09  | ABATACEPT     | CTLA4_CT_P19019691 | Female | 6.51             | 6.67                  | 0.17                     | 0.02                                           | NA                                | 39.7                       | 6.4         | 21.8        | 116.1   | 0.48           | 68                                | 2                                                               | high                    | G4                             | 0                             | 0.27                        | 0.36                         | 0.10                         | 0.10                         | 0.03                         | 0.01 |
| TN09  | ABATACEPT     | CTLA4_CT_P19019970 | Female | 10.02            | 10.24                 | 0.22                     | 0.06                                           | NA                                | 50.2                       | 8.1         | 49.5        | 145     | 1.7            | 96                                | 3                                                               | high                    | G4                             | 0                             | 0.71                        | 0.66                         | 0.41                         | 0.25                         | 0.20                         | 0.15 |
| TN09  | ABATACEPT     | CTLA4_CT_P19027000 | Male   | 14.98            | 15.24                 | 0.26                     | 0.06                                           | NA                                | 36.0                       | 5.8         | 67.5        | 178.5   | 0.4            | 66                                | 4                                                               | high                    | G4                             | 0                             | 0.81                        | 0.85                         | 0.85                         | 0.63                         | 0.48                         | 0.50 |
| TN09  | ABATACEPT     | CTLA4_CT_P19031301 | Female | 11.13            | 11.28                 | 0.15                     | -0.26                                          | NA                                | 40.9                       | 6.6         | 37.9        | 157.4   | -1.13          | 13                                | 3                                                               | high                    | G2                             | 0                             | 0.68                        | 0.59                         | 0.29                         | 0.21                         | 0.03                         | 0.03 |
| TN09  | ABATACEPT     | CTLA4_CT_P19033311 | Female | 8.15             | 8.42                  | 0.27                     | 0.05                                           | NA                                | 44.6                       | 7.2         | 29.7        | 131.6   | 0.52           | 70                                | 2                                                               | high                    | G3                             | 0                             | 0.35                        | 0.24                         | 0.21                         | 0.09                         | 0.05                         | 0.02 |
| TN09  | ABATACEPT     | CTLA4_CT_P19034909 | Male   | 10.35            | 10.63                 | 0.27                     | -0.23                                          | NA                                | 42.8                       | 6.9         | 59.7        | 157.7   | 1.83           | 97                                | 3                                                               | low                     | G4                             | 0                             | 1.29                        | 1.39                         | 1.10                         | 1.23                         | 0.98                         | 0.87 |
| TN09  | ABATACEPT     | CTLA4_CT_P19034944 | Male   | 34.78            | 35.00                 | 0.22                     | -0.45                                          | NA                                | 41.5                       | 6.7         | 83          | 176.6   | 0.1            | 54                                | 3                                                               | high                    | G1                             | 0                             | 0.58                        | 0.75                         | 0.66                         | 0.75                         | 0.66                         | 0.57 |
| TN09  | ABATACEPT     | CTLA4_CT_P19035621 | Male   | 17.25            | 17.50                 | 0.25                     | 0.05                                           | NA                                | 36.6                       | 5.9         | 86.8        | 175     | 1.61           | 95                                | 2                                                               | high                    | G3                             | 0                             | 1.06                        | 0.71                         | 0.88                         | 0.61                         | 0.62                         | 0.52 |
| TN09  | ABATACEPT     | CTLA4_CT_P19039251 | Male   | 13.45            | 13.66                 | 0.21                     | 0.17                                           | NA                                | 37.8                       | 6.1         | 46.4        | 164.5   | -0.8           | 21                                | 3                                                               | low                     | G4                             | 0                             | 0.51                        | 0.47                         | 0.38                         | 0.37                         | 0.28                         | 0.28 |
| TN09  | ABATACEPT     | CTLA4_CT_P19040109 | Female | 15.85            | 16.06                 | 0.21                     | -0.14                                          | NA                                | 39.7                       | 6.4         | 112.1       | 169.9   | 2.33           | 99                                | 2                                                               | high                    | G1                             | 0                             | 1.75                        | 1.12                         | 1.40                         | 1.61                         | 1.30                         | 1.49 |
| TN09  | ABATACEPT     | CTLA4_CT_P19041256 | Female | 20.18            | 20.44                 | 0.26                     | 0.03                                           | NA                                | 36.6                       | 5.9         | 61.7        | 161.3   | 0.08           | 53                                | 4                                                               | low                     | G1                             | CT_8Resp                      | 0.53                        | 0.39                         | NA                           | NA                           | NA                           | 0.57 |
| TN09  | ABATACEPT     | CTLA4_CT_P19042186 | Female | 13.76            | 13.98                 | 0.22                     | -0.50                                          | NA                                | 47.1                       | 7.6         | 42.5        | 159     | -1.06          | 15                                | 3                                                               | high                    | G1                             | 0                             | 0.49                        | 0.57                         | 0.61                         | 0.56                         | 0.50                         | 0.38 |
| TN09  | ABATACEPT     | CTLA4_CT_P19043824 | Male   | 17.75            | 18.02                 | 0.27                     | 0.77                                           | NA                                | 34.7                       | 5.6         | 72.5        | 169     | 0.98           | 84                                | 3                                                               | high                    | OL                             | CT_8Resp                      | 2.42                        | 2.03                         | 2.19                         | 1.90                         | 1.87                         | 2.53 |
| TN09  | ABATACEPT     | CTLA4_CT_P19045146 | Female | 7.50             | 7.77                  | 0.27                     | 0.08                                           | NA                                | 44.6                       | 7.2         | 34.2        | 129.7   | 1.63           | 95                                | 3                                                               | high                    | G1                             | 0                             | 0.53                        | 0.52                         | 0.54                         | 0.38                         | 0.23                         | 0.28 |
| TN09  | ABATACEPT     | CTLA4_CT_P19048858 | Male   | 8.93             | 9.18                  | 0.25                     | -0.28                                          | NA                                | 34.1                       | 5.5         | 30.8        | 129.2   | 0.91           | 82                                | 4                                                               | high                    | G1                             | 0                             | 0.67                        | 0.49                         | 0.34                         | 0.34                         | 0.34                         | 0.20 |
| TN09  | ABATACEPT     | CTLA4_CT_P19051989 | Male   | 7.48             | 7.73                  | 0.25                     | 0.04                                           | NA                                | 40.9                       | 6.6         | 28.8        | 122     | 1.54           | 94                                | 4                                                               | low                     | G4                             | 0                             | 0.36                        | 0.17                         | 0.11                         | 0.03                         | 0.01                         | 0.01 |
| TN09  | ABATACEPT     | CTLA4_CT_P19052289 | Female | 23.78            | 24.04                 | 0.26                     | 0.24                                           | NA                                | 30.4                       | 4.9         | 60.5        | 160.1   | 0.2            | 57                                | 1                                                               | high                    | G4                             | 0                             | 0.91                        | 0.92                         | 0.71                         | 0.55                         | 0.40                         | 0.22 |
| TN09  | ABATACEPT     | CTLA4_CT_P19053269 | Male   | 11.10            | 11.36                 | 0.25                     | -0.34                                          | NA                                | 33.5                       | 5.4         | 44.9        | 142.9   | 1.37           | 92                                | 2                                                               | high                    | G1                             | 0                             | 1.08                        | 0.96                         | 0.76                         | 0.52                         | 0.27                         | 0.24 |
| TN09  | ABATACEPT     | CTLA4_CT_P19055573 | Male   | 17.08            | 17.35                 | 0.27                     | -0.19                                          | NA                                | 40.9                       | 6.6         | 93          | 181     | 1.63           | 95                                | 3                                                               | high                    | G1                             | 0                             | 1.20                        | 1.01                         | 1.17                         | 1.09                         | 0.82                         | 0.77 |
| TN09  | ABATACEPT     | CTLA4_CT_P19059514 | Female | 17.74            | 17.99                 | 0.25                     | -0.47                                          | NA                                | 37.8                       | 6.1         | 55.2        | 166.3   | -0.46          | 32                                | 4                                                               | low                     | G1                             | 0                             | 0.71                        | 0.70                         | 0.63                         | NA                           | NA                           | 0.25 |
| TN09  | ABATACEPT     | CTLA4_CT_P19060795 | Male   | 17.02            | 17.29                 | 0.27                     | -0.28                                          | NA                                | 34.7                       | 5.6         | 79.5        | 174     | 1.27           | 90                                | 2                                                               | high                    | G1                             | 0                             | 0.56                        | 0.74                         | 0.96                         | 0.90                         | 0.68                         | 0.49 |
| TN09  | ABATACEPT     | CTLA4_CT_P19060824 | Female | 11.18            | 11.40                 | 0.23                     | 0.20                                           | NA                                | NA                         | NA          | 42.1        | 154.9   | -0.06          | 48                                | 3                                                               | low                     | G3                             | 0                             | 0.78                        | 0.86                         | 0.40                         | 0.26                         | 0.14                         | 0.04 |
| TN09  | ABATACEPT     | CTLA4_CT_P19064499 | Male   | 33.43            | 33.70                 | 0.27                     | 0.17                                           | NA                                | 32.2                       | 5.2         | 70.5        | 172.1   | -0.44          | 33                                | 2                                                               | low                     | G3                             | CT_8Resp                      | 0.75                        | 1.01                         | 1.23                         | 0.97                         | 0.74                         | 0.71 |
| TN09  | ABATACEPT     | CTLA4_CT_P19066427 | Female | 7.30             | 7.47                  | 0.17                     | -0.21                                          | NA                                | 42.8                       | 6.9         | 24.2        | 123.3   | 0.18           | 57                                | 2                                                               | high                    | G1                             | 0                             | 0.45                        | 0.49                         | 0.65                         | 0.50                         | 0.42                         | 0.37 |
| TN09  | ABATACEPT     | CTLA4_CT_P19068024 | Male   | 10.54            | 10.81                 | 0.27                     | 0.40                                           | NA                                | 45.9                       | 7.4         | 46.5        | 141.5   | 1.68           | 95                                | 1                                                               | high                    | G3                             | CT_8Resp                      | 0.22                        | 0.24                         | 0.22                         | NA                           | NA                           | 0.11 |
| TN09  | ABATACEPT     | CTLA4_CT_P19068424 | Male   | 34.29            | 34.50                 | 0.21                     | 0.24                                           | NA                                | 34.1                       | 5.5         | 84.4        | 191.4   | -0.64          | 26                                | 2                                                               | low                     | G3                             | CT_8Resp                      | 1.35                        | 1.55                         | 1.74                         | 1.56                         | 1.36                         | 1.43 |
| TN09  | ABATACEPT     | CTLA4_CT_P19072101 | Male   | 9.61             | 9.77                  | 0.16                     | -0.06                                          | NA                                | 42.2                       | 6.8         | 29.1        | 141.5   | -1.3           | 10                                | 1                                                               | high                    | G1                             | 0                             | 0.44                        | 0.70                         | 0.76                         | 0.64                         | 0.49                         | 0.46 |
| TN09  | ABATACEPT     | CTLA4_CT_P19074578 | Female | 12.21            | 12.46                 | 0.25                     | -0.12                                          | NA                                | 32.2                       | 5.2         | 44.3        | 147     | 0.66           | 75                                | 3                                                               | high                    | G1                             | 0                             | 1.60                        | 1.58                         | 1.33                         | 1.28                         | NA                           | 0.99 |
| TN09  | ABATACEPT     | CTLA4_CT_P19082597 | Male   | 26.93            | 27.19                 | 0.26                     | 0.12                                           | NA                                | 28.5                       | 4.6         | 87          | 190.9   | -0.18          | 43                                | 3                                                               | high                    | G3                             | 0                             | 0.94                        | 0.57                         | 0.67                         | 0.81                         | 0.33                         | 0.52 |
| TN09  | ABATACEPT     | CTLA4_CT_P19083384 | Male   | 10.42            | 10.69                 | 0.27                     | 0.10                                           | NA                                | 40.3                       | 6.5         | 40          | 141.2   | 1.08           | 86                                | 3                                                               | high                    | G3                             | CT_8Resp                      | 0.47                        | 0.60                         | 0.75                         | 0.51                         | 0.48                         | 0.43 |
| TN09  | ABATACEPT     | CTLA4_CT_P19084943 | Male   | 15.40            | 15.67                 | 0.27                     | 0.34                                           | NA                                | 36.6                       | 5.9         | 74.3        | 175     | 1.11           | 87                                | 4                                                               | high                    | G3                             | 0                             | 0.67                        | 0.87                         | 0.66                         | 0.32                         | 0.59                         | 0.56 |
| TN09  | ABATACEPT     | CTLA4_CT_P19084986 | Female | 10.55            | 10.76                 | 0.21                     | 0.36                                           | NA                                | 36.6                       | 5.9         | 61.5        | 155.3   | 1.87           | 97                                | 4                                                               | high                    | G3                             | 0                             | 1.27                        | 1.48                         | 1.79                         | 1.74                         | 1.52                         | 1.03 |
| TN09  | ABATACEPT     | CTLA4_CT_P19086296 | Male   | 12.88            | 13.07                 | 0.19                     | 0.15                                           | NA                                | 36.6                       | 5.9         | 51.5        | 158     | 0.072          | 76                                | 4                                                               | high                    | G4                             | 0                             | 1.45                        | 1.28                         | 1.19                         | 0.92                         | 0.98                         | 0.80 |
| TN09  | ABATACEPT     | CTLA4_CT_P19087810 | Male   | 8.77             | 9.03                  | 0.26                     | 0.04                                           | NA                                | 36.0                       | 5.8         | 28          | 131.1   | 0.07           | 53                                | 2                                                               | high                    | G2                             | 0                             | 0.50                        | 0.53                         | 0.46                         | 0.53                         | 0.40                         | 0.49 |
| TN09  | ABATACEPT     | CTLA4_CT_P19088623 | Male   | 11.32            | 11.58                 | 0.27                     | -0.88                                          | NA                                | 45.3                       | 7.3         | 31.1        | 136.6   | -0.41          | 34                                | 2                                                               | high                    | G1                             | 0                             | 0.51                        | 0.42                         | 0.28                         | 0.16                         | 0.10                         | 0.06 |
| TN09  | ABATACEPT     | CTLA4_CT_P19088950 | Female | 12.55            | 12.82                 | 0.27                     | -0.17                                          | NA                                | 38.4                       | 6.2         | 56.8        | 157.4   | 1.14           | 87                                | 2                                                               | high                    | G1                             | 0                             | 0.90                        | 0.81                         | 1.03                         | 1.14                         | 0.78                         | 0.47 |
| TN09  | ABATACEPT     | CTLA4_CT_P19088997 | Male   | NA               | 15.85                 | NA                       | 0.07                                           | NA                                | 36.0                       | 5.8         | 81.7        | 170.7   | 1.73           | 96                                | 3                                                               | low                     | G3                             | CT_8Resp                      | 1.75                        | 1.65                         | 1.45                         | 1.75                         | 1.69                         | 2.63 |
| TN09  | ABATACEPT     | CTLA4_CT_P19090498 | Female | 6.37             | 6.54                  | 0.17                     | -0.30                                          | NA                                | 44.0                       | 7.1         | 25.6        | 126.1   | 0.46           | 68                                | 4                                                               | high                    | G2                             | 0                             | 0.31                        | 0.11                         | 0.12                         | 0.02                         | 0.02                         | 0.01 |
| TN09  | ABATACEPT     | CTLA4_CT_P19091454 | Male   | 10.95            | 11.19                 | 0.25                     | -0.40                                          | NA                                | 36.0                       | 5.8         | 44.1        | 148     | 0.99           | 84                                | 2                                                               | high                    | G1                             | 0                             | 1.24                        | 0.86                         | 0.73                         | 0.62                         | 0.58                         | 0.44 |
| TN09  | ABATACEPT     | CTLA4_CT_P19092010 | Male   | 13.36            | 13.59                 | 0.23                     | 0.03                                           | NA                                | 34.7                       | 5.6         | 54.6        | 162.3   | 0.63           | 74                                | 1                                                               | low                     | G3                             | 0                             | 1.65                        | 0.32                         | 1.28                         | 0.95                         | 1.11                         | 0.64 |
| TN09  | ABATACEPT     | CTLA4_CT_P19092037 | Female | 11.84            | 12.07                 | 0.23                     | -0.03                                          | NA                                | 32.2                       | 5.2         | 38.8        | 143     | 0.3            | 62                                | 4                                                               | high                    | G4                             | 0                             | 0.60                        | 0.38                         | 0.13                         | 0.39                         | 0.19                         | 0.13 |
| TN09  | ABATACEPT     | CTLA4_CT_P19092765 | Male   | 18.04            | 18.28                 | 0.24                     | 0.12                                           | NA                                | 42.8                       | 6.9         | 73.54       | 176     | 0.52           | 72                                | 2                                                               | high                    | G4                             | 0                             | 0.55                        | 0.48                         | 0.36                         | 0.34                         | 0.25                         | 0.21 |
| TN09  | ABATACEPT     | CTLA4_CT_P19093838 | Female | 26.68            | 26.95                 | 0.27                     | 0.16                                           | NA                                | NA                         | NA          | 52.8        | 159.4   | -0.77          | 22                                | 2                                                               | high                    | G4                             | 0                             | 0.70                        | 0.48                         | 0.59                         | 0.40                         | 0.43                         | 0.43 |
| TN09  | ABATACEPT     | CTLA4_CT_P19095979 | Female | 10.53            | 10.81                 | 0.27                     | -0.01                                          | NA                                | 40.3                       | 6.5         | 31.3        | 144.9   | -1.24          | 11                                | 3                                                               | high                    | G4                             | 0                             | 0.40                        | 1.22                         | 0.39                         | 0.27                         | 0.14                         | 0.14 |
| TN09  | ABATACEPT     | CTLA4_CT_P19097442 | Female | 10.10            | 10.35                 | 0.26                     | 0.08                                           | NA                                | 42.8                       | 6.9         | 33.2        | 135.8   | 0.37           | 64                                | 2                                                               | high                    | G4                             | 0                             | 0.44                        | 0.36                         | 0.38                         | 0.33                         | 0.21                         | 0.06 |
| TN09  | ABATACEPT     | CTLA4_CT_P19098085 | Male   | 27.86            | 28.12                 | 0.26                     | -0.26                                          | NA                                | 38.4                       | 6.2         | 80.9        | 187     | -0.15          | 44                                | 2                                                               | high                    | G1                             | 0                             | 0.64                        | 0.74                         | 0.73                         | 1.02                         | 0.93                         | 0.69 |
| TN09  | PLACEBO       | CTLA4_PL_P19001411 | Male   | 8.98             | 9.23                  | 0.25                     | 0.11                                           | 0.2                               | 39.1                       | 6.          |             |         |                |                                   |                                                                 |                         |                                |                               |                             |                              |                              |                              |                              |      |

ESM TABLE 1 Subject Information LOCAL

| Study                    | Sample Identifier | Gender | Age at diagnosis | Age at visit | Duration of DM @ visit | Length of Partial Remission |            | HbA1C at Diagnosis (mmol/mol) | HbA1C at Diagnosis (%) | Weight (kg) | Height (cm) | BMI SDS | BMI Percentile | Number of Detected Autoantibodies | Used for: Treg (T) enumeration or CTLA4Ig Addback (A) | HLA Risk (High: DR3 and/ or DR4 positive; Low nonDR3 and nonDR4) |
|--------------------------|-------------------|--------|------------------|--------------|------------------------|-----------------------------|------------|-------------------------------|------------------------|-------------|-------------|---------|----------------|-----------------------------------|-------------------------------------------------------|------------------------------------------------------------------|
|                          |                   |        |                  |              |                        | I.I.359                     | IDAA1C > 9 |                               |                        |             |             |         |                |                                   |                                                       |                                                                  |
| LOCAL                    | RO2350            | Female | 7.25             | 7.56         | 0.3123                 | NA                          | 0.33       | 72.5                          | 11.7                   | 25.9        | 126.1       | 0.35    | 64             | 4                                 | T                                                     | high                                                             |
| LOCAL                    | RO2527            | Male   | 10.97            | 11.29        | 0.326                  | NA                          | 0.86       | 57.7                          | 9.3                    | 39.7        | 148         | 0.32    | 63             | 4                                 | T                                                     | high                                                             |
| LOCAL                    | RO2973            | Female | 13.92            | 14.05        | 0.1342                 | NA                          | 1.1        | 86.8                          | >14                    | 70.1        | 161.8       | 1.58    | 94             | 4                                 | T                                                     | high                                                             |
| LOCAL                    | RO3291            | Female | 6.35             | 6.83         | 0.4767                 | NA                          | 0.28       | 71.9                          | 11.6                   | 31.2        | 134.9       | 0.89    | 81             | 4                                 | T                                                     | high                                                             |
| LOCAL                    | RO3325            | Male   | 9.66             | 10.12        | 0.4575                 | NA                          | 1.01       | 78.7                          | 12.7                   | 43.5        | 145.9       | 1.29    | 90             | 4                                 | T                                                     | high                                                             |
| LOCAL                    | RO3373            | Female | 6.79             | 7.17         | 0.3808                 | NA                          | 0.29       | 86.8                          | >14                    | 25.9        | 129.3       | -0.01   | 50             | 0                                 | T                                                     | high                                                             |
| LOCAL                    | RO3593            | Female | 11.44            | 11.56        | 0.1233                 | NA                          | 0.74       | 85.6                          | 13.8                   | 34.7        | 148.5       | -0.95   | 17             | 2                                 | T                                                     | NA                                                               |
| LOCAL                    | RO3664            | Female | 15.73            | 16.08        | 0.3534                 | NA                          | 0.4        | NA                            | NA                     | 53.6        | 151.1       | 0.79    | 79             | 1                                 | T                                                     | low                                                              |
| LOCAL                    | RO3676            | Male   | 11.45            | 11.78        | 0.3342                 | NA                          | 0.82       | 64.5                          | 10.4                   | 80          | 172.8       | 1.99    | 98             | 4                                 | T                                                     | high                                                             |
| LOCAL                    | RO3757            | Male   | 5.64             | 6.08         | 0.4438                 | NA                          | 0.74       | 42.2                          | 6.8                    | 26.6        | 124.4       | 1.11    | 87             | 2                                 | T                                                     | low                                                              |
| LOCAL                    | RO3775            | Female | 16.97            | 17.14        | 0.1726                 | NA                          | 1.1        | 54.6                          | 8.8                    | 65.6        | 169.3       | 0.55    | 71             | 3                                 | T                                                     | low                                                              |
| LOCAL                    | RO3803            | Female | 10.40            | 10.85        | 0.4548                 | NA                          | 0.87       | 86.8                          | >14                    | 36.6        | 148.5       | -0.33   | 37             | 3                                 | T                                                     | low                                                              |
| LOCAL                    | RO3810            | Female | 16.65            | 17.06        | 0.4082                 | NA                          | 1.1        | 81.2                          | 13.1                   | 57.1        | 172         | -0.61   | 27             | 4                                 | T                                                     | low                                                              |
| LOCAL                    | RO3887            | Male   | 7.27             | 7.34         | 0.0712                 | NA                          | 0.3        | 52.7                          | 8.5                    | 24.8        | 127         | -0.15   | 44             | 4                                 | T                                                     | NA                                                               |
| LOCAL                    | RO3940            | Female | 10.82            | 11.15        | 0.3205                 | NA                          | 0.34       | 86.8                          | >14                    | 41.5        | 142         | 0.93    | 82             | 4                                 | T                                                     | NA                                                               |
| LOCAL                    | RO253             | Male   | 10.38            | 10.74        | 0.3616                 | 0.73                        | 0.53       | 49.6                          | 8                      | 60.2        | 157.5       | 1.83    | 97             | 4                                 | NA                                                    | low                                                              |
| LOCAL                    | RO946             | Female | 10.68            | 10.84        | 0.1562                 | -0.05                       | 0.3        | 74.4                          | 12                     | 49.2        | 148.5       | 1.37    | 91             | 4                                 | NA                                                    | high                                                             |
| LOCAL                    | RO949             | Male   | 9.81             | 10.34        | 0.5315                 | 0.40                        | 0.53       | 71.3                          | 11.5                   | 38.7        | 133.5       | 1.5     | 93             | 0                                 | T                                                     | high                                                             |
| LOCAL                    | RO972             | Male   | 11.47            | 11.75        | 0.2822                 | 0.36                        | 0.28       | 77.5                          | 12.5                   | 38.5        | 142.5       | 0.5     | 69             | 4                                 | NA                                                    | low                                                              |
| LOCAL                    | RO1123            | Female | 13.12            | 13.34        | 0.2219                 | 0.41                        | 0.95       | 73.2                          | 11.8                   | 54          | 166         | 0.22    | 59             | 0                                 | NA                                                    | low                                                              |
| LOCAL                    | RO1964            | Female | 9.75             | 9.84         | 0.0849                 | 0.71                        | 0.34       | 69.4                          | 11.2                   | 43.6        | 155.5       | 0.5     | 69             | 4                                 | NA                                                    | high                                                             |
| LOCAL                    | RO1997            | Male   | 12.75            | 12.98        | 0.2274                 | 0.14                        | 0.8        | 86.8                          | >14                    | 49.8        | 153.2       | 0.88    | 81             | 3                                 | T                                                     | high                                                             |
| LOCAL                    | RO2034            | Male   | 5.82             | 5.96         | 0.137                  | 0.43                        | 0.83       | 49.0                          | 7.9                    | 25.2        | 126.2       | 0.32    | 63             | 4                                 | NA                                                    | low                                                              |
| LOCAL                    | RO2130            | Male   | 15.39            | 15.62        | 0.2274                 | 0.77                        | 0.32       | 68.8                          | 11.1                   | 82          | 188         | 0.88    | 81             | 2                                 | NA                                                    | low                                                              |
| LOCAL                    | RO2348            | Female | 9.38             | 9.65         | 0.2685                 | 0.71                        | 0.55       | 67.6                          | 10.9                   | 27.3        | 136.8       | -1.16   | 12             | 4                                 | NA                                                    | low                                                              |
| LOCAL                    | RO2359            | Female | 11.88            | 12.04        | 0.1589                 | 0.01                        | 2.41       | 86.8                          | >14                    | 45.1        | 160.7       | -0.25   | 40             | 3                                 | NA                                                    | high                                                             |
| LOCAL                    | RO2559            | Male   | 11.39            | 11.8         | 0.4055                 | 0.52                        | 1.08       | 72.5                          | 11.7                   | 41.6        | 150         | 0.31    | 59             | 4                                 | NA                                                    | high                                                             |
| LOCAL                    | RO2808            | Male   | 9.39             | 9.55         | 0.1644                 | 0.75                        | 0.59       | 86.8                          | >14                    | 48.5        | 145.1       | 1.87    | 97             | 4                                 | A                                                     | high                                                             |
| LOCAL                    | RO2936            | Male   | 11.55            | 11.85        | 0.2959                 | 0.12                        | 1.34       | 56.4                          | 9.1                    | 31.5        | 134         | -0.07   | 47             | 3                                 | NA                                                    | high                                                             |
| LOCAL                    | RO2944            | Female | 6.36             | 6.49         | 0.1315                 | 0.76                        | 0.28       | >86.8                         | >14                    | 25.4        | 127.2       | 0.24    | 59             | 4                                 | NA                                                    | low                                                              |
| LOCAL                    | RO2953            | Female | 8.92             | 9.12         | 0.2027                 | 1.27                        | 0.29       | 52.7                          | 8.5                    | 30.6        | 135.2       | 0.18    | 57             | 3                                 | A                                                     | low                                                              |
| LOCAL                    | RO3052            | Female | 8.38             | 8.98         | 0.6027                 | 0.10                        | 1.86       | 78.1                          | 12.6                   | 39          | 145         | 0.87    | 81             | 3                                 | A                                                     | high                                                             |
| LOCAL                    | RO3139            | Female | 12.03            | 12.47        | 0.4329                 | 0.01                        | 0.89       | 69.4                          | 11.2                   | 40.8        | 150.7       | -0.17   | 43             | 4                                 | T                                                     | high                                                             |
| LOCAL                    | RO3309            | Female | 6.91             | 7            | 0.0904                 | 0.70                        | 0.29       | 56.4                          | 9.1                    | 19.5        | 119.1       | -1.32   | 9              | 1                                 | T                                                     | high                                                             |
| LOCAL                    | RO3367            | Male   | 5.19             | 5.48         | 0.2904                 | 0.90                        | 0.56       | 53.9                          | 8.7                    | 18.5        | 114         | -1.1    | 14             | 2                                 | T                                                     | high                                                             |
| LOCAL                    | RO3521            | Male   | 5.91             | 6.13         | 0.2137                 | 0.31                        | 0.84       | 57.7                          | 9.3                    | 21.3        | 114         | 0.68    | 75             | 3                                 | T                                                     | high                                                             |
| LOCAL                    | RO3527            | Female | 4.47             | 4.86         | 0.3836                 | -0.02                       | 1.23       | 49.0                          | 7.9                    | 18          | 109.2       | -0.05   | 48             | 4                                 | T                                                     | high                                                             |
| LOCAL                    | RO3555            | Male   | 10.68            | 10.9         | 0.2219                 | 0.46                        | 0.29       | 67.6                          | 10.9                   | 56.9        | 156         | 1.68    | 95             | 3                                 | A                                                     | low                                                              |
| LOCAL                    | RO3572            | Male   | 4.88             | 5.16         | 0.2767                 | 0.62                        | 0.63       | 56.4                          | 9.1                    | 20.6        | 112.4       | 0.69    | 75             | 4                                 | T                                                     | high                                                             |
| LOCAL                    | RO3585            | Male   | 5.78             | 6.26         | 0.474                  | 0.27                        | 0.5        | 76.3                          | 12.3                   | 23.6        | 125.9       | -0.42   | 34             | 4                                 | NA                                                    | high                                                             |
| LOCAL                    | RO3621            | Female | 8.61             | 8.91         | 0.2932                 | 0.52                        | 0.34       | 78.1                          | 12.6                   | 28.2        | 128.6       | 0.35    | 64             | 3                                 | NA                                                    | low                                                              |
| LOCAL                    | RO2598            | Male   | 6.21             | 6.71         | 0.4959                 | 0.54                        | 0          | 67.6                          | 10.9                   | 22.1        | 113.8       | 0.95    | 83             | 4                                 | A                                                     | high                                                             |
| Mean TN09 Subset (n=74)  |                   |        | 14.71            | 14.99        | 0.24                   |                             |            |                               |                        | 55.04       | 154.82      | 0.46    | 64.23          | 2.69                              |                                                       |                                                                  |
| SD TN09 Subset (n=74)    |                   |        | 6.81             | 6.73         | 0.04                   |                             |            |                               |                        | 21.52       | 26.24       | 0.93    | 27.5           | 0.91                              |                                                       |                                                                  |
| Mean Local (n=42)        |                   |        | 9.72             | 10.02        | 0.3                    |                             |            |                               |                        | 39.44       | 141.67      | 0.45    | 63.79          | 3.14                              |                                                       |                                                                  |
| SD Local (n=42)          |                   |        | 3.27             | 3.26         | 0.14                   |                             |            |                               |                        | 16.45       | 18.57       | 0.83    | 25.23          | 1.22                              |                                                       |                                                                  |
| p-value (2 sample ttest) |                   |        | 2.05E-05         | 1.68E-05     | 1.14E-03               |                             |            |                               |                        | 8.79E-05    | 5.00E-03    | 0.98    | 0.93           | 0.02                              |                                                       |                                                                  |

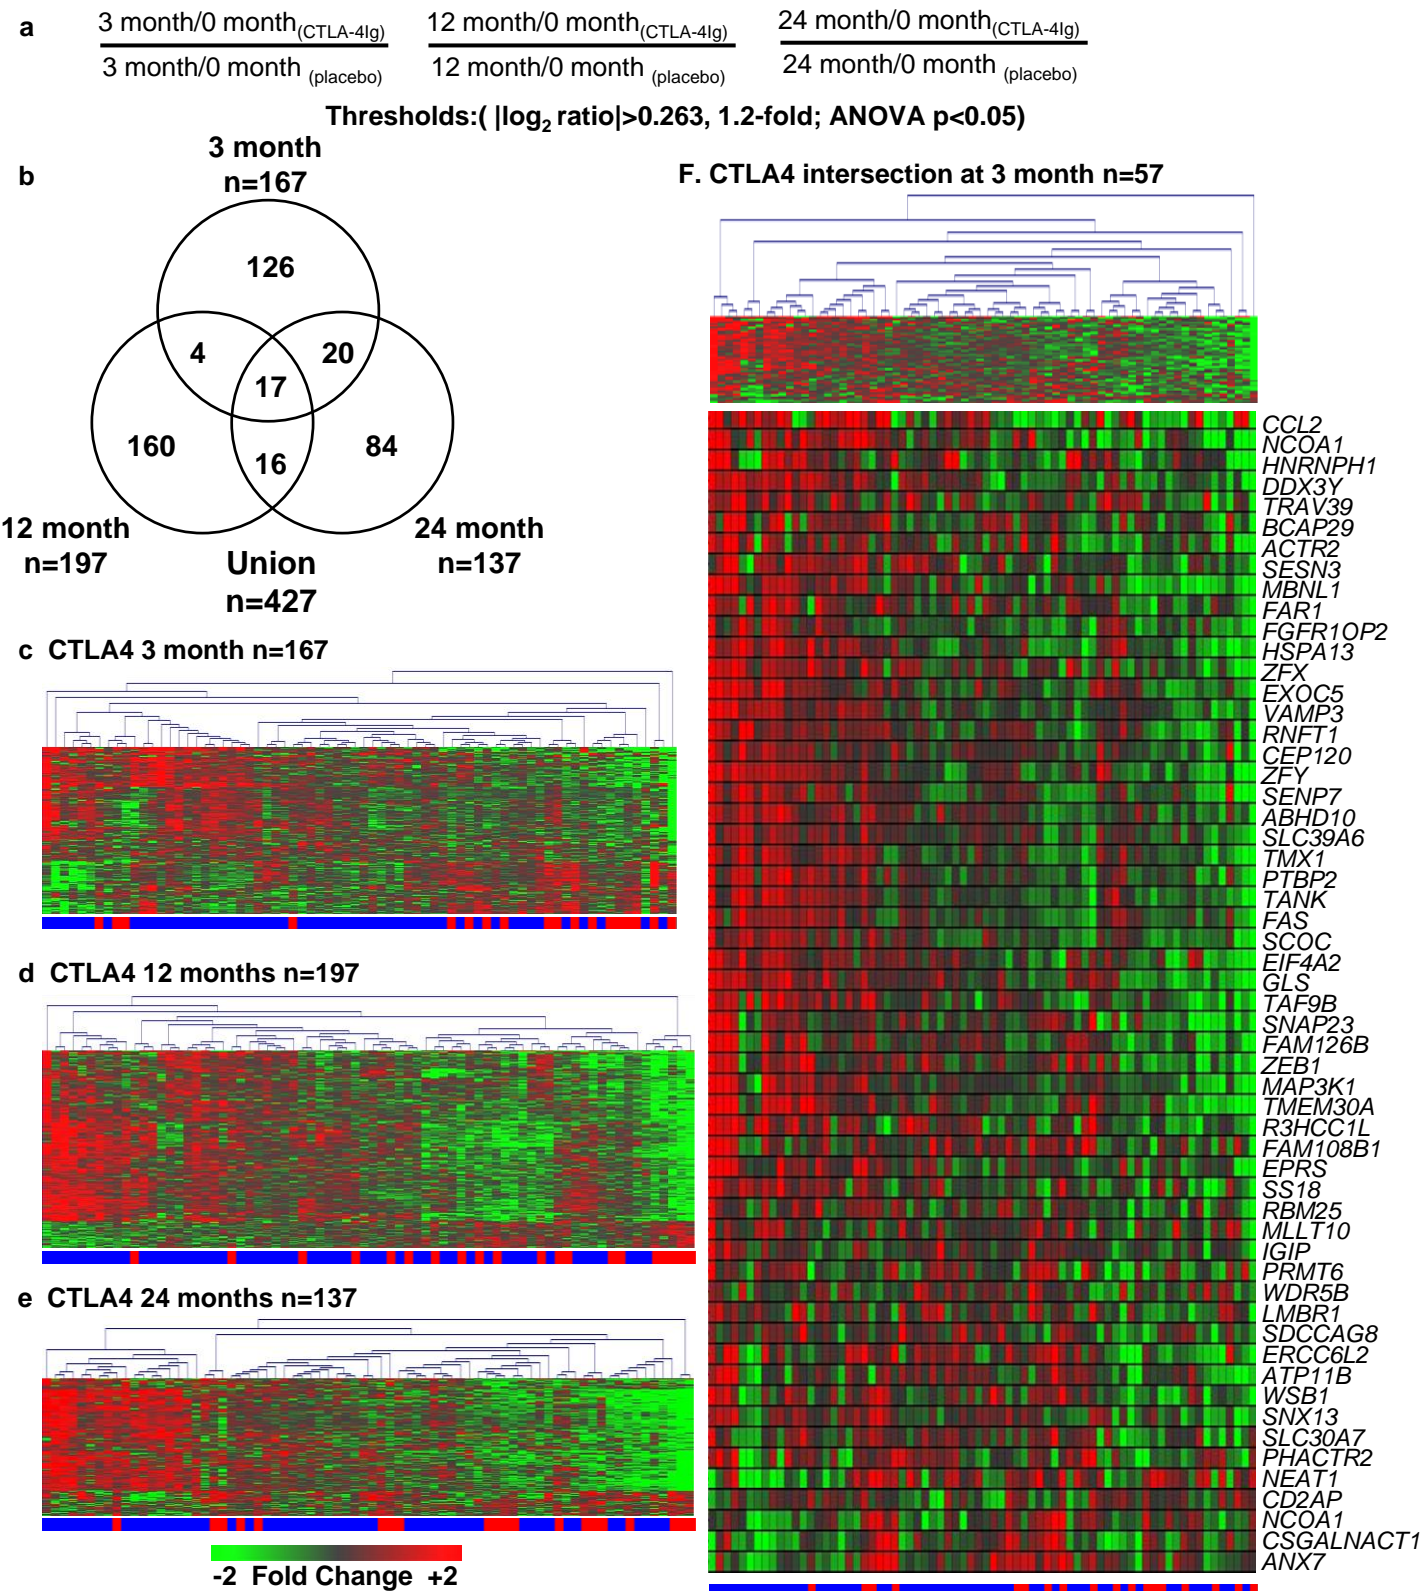

ESM Figure 1. This analysis of the TN-09 trial included 54 CTLA4-Ig-treated patients and 20 placebo-treated patients. Plasma induced transcription was conducted at the baseline, 3 month, 12 month, and 24 month time points. **(a)** Analysis strategy. For each subject, gene expression measured at 3, 12, and 24 months was baseline normalized. **(b)** Venn diagram illustrating the total of 427 probe sets that were differentially induced ( $|\log_2 \text{ratio}| > 0.263$ , 1.2-fold; ANOVA  $p < 0.05$ ) between the treatment and placebo arms at  $\geq 1$  time point. **(c-e)** Two-way hierarchical clustering (probe sets and subjects) for the regulated probe sets respectively identified between CTLA4-Ig-treated (blue bar) and placebo-treated (red bar) subjects at 3 ( $n=167$  probe sets), 12 ( $n=197$  probe sets), and 24 months ( $n=137$  probe sets) was conducted. There was heterogeneity in both study arms, as evidenced the imperfect clustering observed at each time point. **(f)** An intersection of 57 probe sets, regulated between the two arms at all time points was identified. Well annotated transcripts of the intersection are shown.
